# Supplementary material for: Fly ash derived calcium silicate hydrate as a highly efficient and fast adsorbent for Cu(ii) ions: role of copolymer functionalization
Source: Royal Society of Chemistry journal article supplement (doi:10.1039/d2ra03007a), 2022-01-01
Supplement: d2ra03007a1.pdf [file d2ra03007a1.pdf]

## Support Information

# **Fly ash derived calcium silicate hydrate as a highly efficient and fast adsorbent for Cu(II) ions: roles of copolymer functionalization**

Shengrui Sun,<sup>a,b</sup> Ya Tang,<sup>a,c</sup> Jiayi Li,<sup>a</sup> Jiahui Kou,<sup>\*,c</sup> and Yangqiao Liu<sup>\*,a,b</sup>

<sup>a</sup>Shanghai Institute of Ceramics, Chinese Academy of Sciences, Shanghai 200050, China

<sup>b</sup>Jiangsu Research Institute of Advanced Inorganic Materials, Taicang 215488, China

<sup>c</sup>College of Materials Science and Engineering, Nanjing Tech University, Nanjing211816, China

\* Corresponding authors

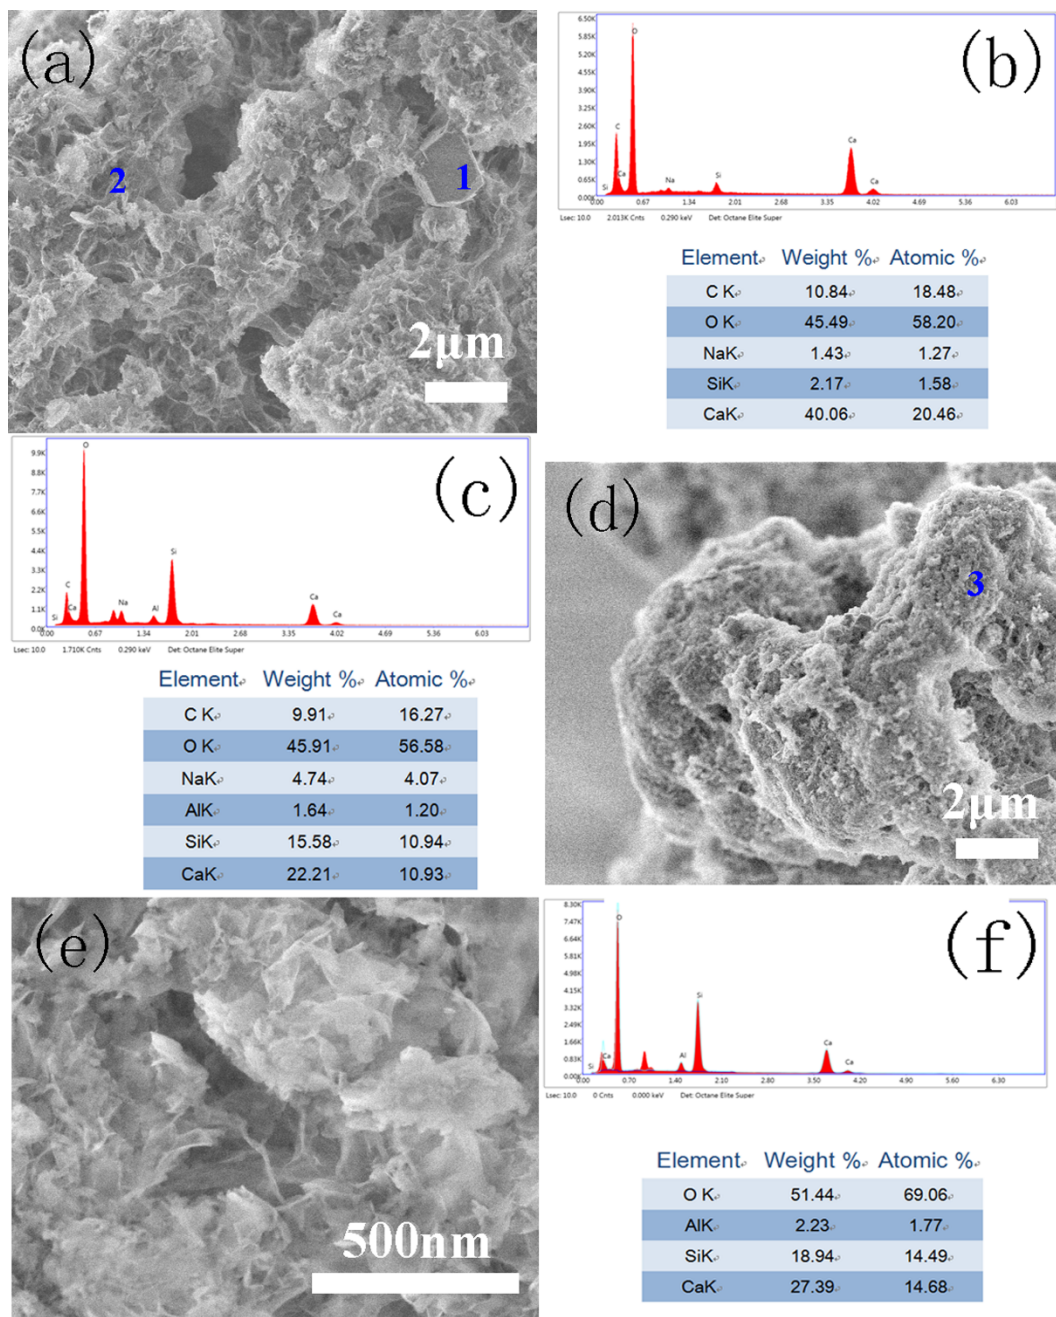

Figure S1 SEM (a) and EDS (b-c) of CSH(b and c corresponding to point 1 and 2, respectively); SEM (d-e) and EDS(f) (corresponding to point 3) of ACSH

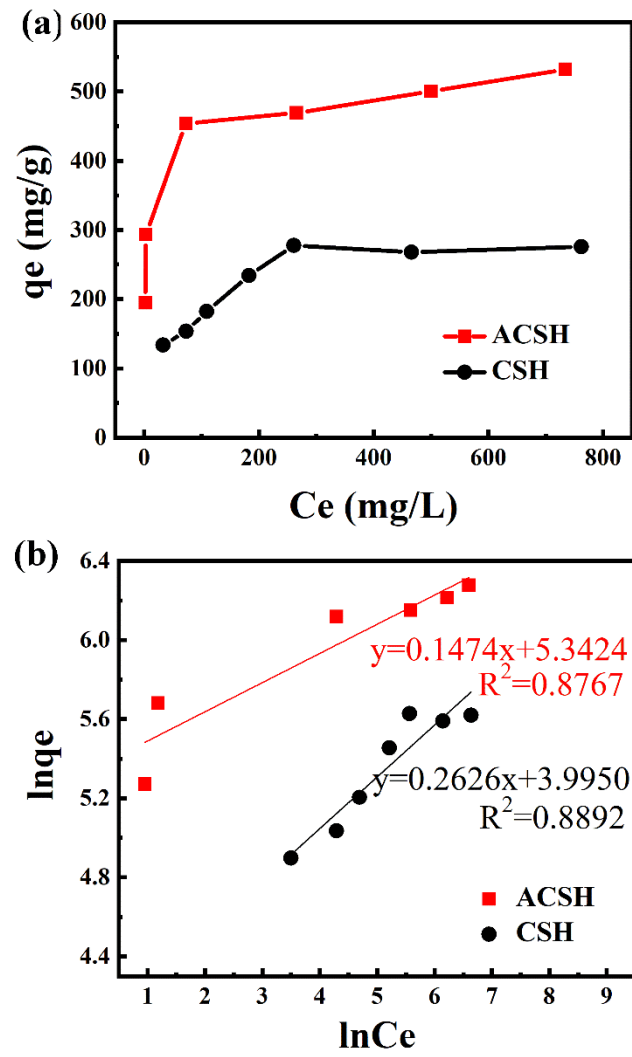

Figure S2 (a) Isothermal adsorption and (b) linearized fitting curves of Freundlich model.

Table S1 Chemical components of raw fly ash and desilication fly ash.

| <b>wt%</b>                  | <b>SiO<sub>2</sub></b> | <b>Al<sub>2</sub>O<sub>3</sub></b> | <b>Fe<sub>2</sub>O<sub>3</sub></b> | <b>CaO</b> | <b>TiO<sub>2</sub></b> | <b>MgO</b> | <b>Na<sub>2</sub>O</b> | <b>SO<sub>3</sub></b> | <b>Total</b> |
|-----------------------------|------------------------|------------------------------------|------------------------------------|------------|------------------------|------------|------------------------|-----------------------|--------------|
| <b>Raw fly ash</b>          | 48.25                  | 24.04                              | 6.41                               | 11.25      | 1.12                   | 1.47       | 1.54                   | 2.72                  | 96.80        |
| <b>Desilication fly ash</b> | 38.63                  | 24.83                              | 8.78                               | 15.18      | 1.24                   | 1.64       | 8.028                  | 0.06                  | 98.39        |

Table S2 Chemical components of desilication solution.

| <b>mg/( fly ash g)</b>       | <b>Si</b> | <b>Al</b> | <b>Fe</b> | <b>Ca</b> | <b>Mg</b> | <b>Na</b> |
|------------------------------|-----------|-----------|-----------|-----------|-----------|-----------|
| <b>Desilication solution</b> | 86.3      | 9.9       | 0.05      | 0.12      | 0.01      | 902.<br>1 |

Table S3. Fitting parameters for Ca 2p of CSH and ACSH samples.

|              |                   | CSH                          | ACSH   |        |
|--------------|-------------------|------------------------------|--------|--------|
| Ca 2p<br>3/2 | Ca-Si-O           | Peak BE <sup>a</sup><br>(eV) | 347.1  | 346.8  |
|              |                   | FWHM <sup>b</sup><br>(eV)    | 1.79   | 2.05   |
|              |                   | Area %                       | 149712 | 201430 |
|              | CaCO <sub>3</sub> | Peak BE <sup>a</sup><br>(eV) | 346.7  | /      |
|              |                   | FWHM <sup>b</sup><br>(eV)    | 1.55   | /      |
|              |                   | Area %                       | 64902  | /      |
| Ca 2p<br>1/2 | Ca-Si-O           | Peak BE <sup>a</sup><br>(eV) | 350.7  | 350.4  |
|              |                   | FWHM <sup>b</sup><br>(eV)    | 1.81   | 2.12   |
|              |                   | Area %                       | 71856  | 100715 |
|              | CaCO <sub>3</sub> | Peak BE <sup>a</sup><br>(eV) | 350.3  | /      |
|              |                   | FWHM <sup>b</sup><br>(eV)    | 1.5    | /      |
|              |                   | Area %                       | 32452  | /      |

a: Binding Energy

b: Full Width Half Maximum

Table S4 Comparison of various reported adsorbents with ACSH for Cu(II) Adsorption

| Adsorbent type                                                 | Adsorption capacity (mg/g) | Temperature (K)  | Initial pH of Cu(II) solution | BET surface (m <sup>2</sup> /g) | Ref.      |
|----------------------------------------------------------------|----------------------------|------------------|-------------------------------|---------------------------------|-----------|
| activated carbon                                               | 10.00                      | Not mentioned    | Not mentioned                 | 921                             | [1]       |
| walnut shell ash/starch/Fe <sub>3</sub> O <sub>4</sub>         | 45.40                      | Not mentioned    | 6                             | 53                              | [2]       |
| sodium alginate grafted polyacrylamide/graphene oxide hydrogel | 68.76                      | 298              | 5                             | 2                               | [3]       |
| calcium silicate hydrate from coal gangue                      | 70.42                      | 313              | 6                             | 24                              | [4]       |
| Mg/Al layered double hydroxides                                | 137.00                     | 303              | 5                             | 8                               | [5]       |
| mesoporous silica                                              | 153.00                     | 298              | 6                             | 462                             | [6]       |
| alginate@polyethylenimine                                      | 163.70                     | Not mentioned    | 4.5                           | 19                              | [7,8]     |
| PEI-functionalized calcium silicate hydrates                   | 203.25                     | 298              | 4                             | 88                              | [9]       |
| ethylenediamine tetramethylene-phosphonic acid / UiO-66        | 210.89                     | 298              | 5.5                           | 131                             | [10]      |
| humulus scandens-derived biochars                              | 221.00                     | 298              | 5                             | 450                             | [11]      |
| resin based amorphous molybdenum Sulphide                      | 259.00                     | 293              | Not mentioned                 | 28                              | [12]      |
| N-methylene phosphonic chitosan aerogels                       | 276.12                     | 298              | 5                             | 491                             | [13]      |
| calcium silicate obtained by template method                   | 389.85                     | 293              | Not mentioned                 | 239                             | [14]      |
| chitosan-coated calcium silicate hydrate                       | 425.00                     | Room temperature | 6                             | 356                             | [15]      |
| CSH                                                            | 278.00                     | 293              | 5                             | 240                             | This work |
| ACSH                                                           | 532.00                     | 293              | 5                             | 356                             | This work |

Table S5 Comparison of various reported adsorptive membranes for Cu(II) Adsorption

| Adsorbent type                                             | Flux<br>(L*m <sup>2</sup> /h) | Concentration<br>of Cu(II) (mg/L) | Rejection<br>(%) | Ref. |           |
|------------------------------------------------------------|-------------------------------|-----------------------------------|------------------|------|-----------|
| Modified membrane<br>CNTs-ceramic                          | ~23                           | 100                               | 77               | [16] |           |
| Polysulfone<br>Bentonite                                   | added with                    | 46                                | 5                | 59   | [17]      |
| Polysulfone<br>Sepiolite                                   | added with                    | 144                               | 5                | 22   | [17]      |
| Polysulfone added with Zeolite                             |                               | 126                               | 5                | 97   | [17]      |
| 3-Aminopropyltriethoxysilane<br>modified alumina membranes | Not mentioned                 | 20                                | 87               | [18] |           |
| ZIF-8 membranes on alumina<br>hollow fiber support         |                               | 133                               | 10               | 90   | [19]      |
| ACSH based membrane                                        |                               | ~143                              | 20               | 94   | This work |

## References

1. A.Macías-García, M.G. Corzo, M.A. Domínguez, M.A. Franco, J.M. Naharro, Study of the adsorption and electroadsorption process of Cu (II) ions within thermally and chemically modified activated carbon, *J. Hazard. Mater.* 328(2017)46–55, <http://dx.doi.org/10.1016/j.jhazmat.2016.11.036>
2. R. Foroutan, S. J. Peighambari, R. Mohammadi, S. H. Peighambari, B. Ramavandi, Development of new magnetic adsorbent of walnut shell ash/starch/Fe<sub>3</sub>O<sub>4</sub> for effective copper ions removal: Treatment of groundwater samples, *Chemosphere* 296(2022)133978, <https://doi.org/10.1016/j.chemosphere.2022.133978>
3. H. Jiang, Y. Yang, Z. Lin, B. Zhao, J. Wang, J. Xie, A. Zhang, Preparation of a novel bio-adsorbent of sodium alginate grafted polyacrylamide/graphene oxide hydrogel for the adsorption of heavy metal ion, *Sci. Total Environ.* 744(2020)140653, <https://doi.org/10.1016/j.scitotenv.2020.140653>
4. Q. Zhang, G. Liu, S. Peng, C. Zhou, Synthesis of calcium silicate hydrate from coal gangue for Cr(VI) and Cu(II) removal from aqueous solution, *Molecules* 26(2021) 6192, <https://doi.org/10.3390/molecules26206192>
5. H.N. Tran, C.-C. Lin, S. H. Woo, H.-P. Chao, Efficient removal of copper and lead by Mg/Al layered double hydroxides intercalated with organic acid anions: Adsorption kinetics, isotherms, and thermodynamics, *Appl. Clay Sci.* 154(2018)17-27, <https://doi.org/10.1016/j.clay.2017.12.033>
6. M. Santhamoorthy, K. Thirupathi, T. Periyasamy, D. Thirumalai, V. Ramkumar, S.P. Asrafali, S.-C. Kim, Synthesis of bifunctional groups-integrated mesoporous silica hybrid adsorbent for simultaneous removal of Hg<sup>2+</sup> and Cu<sup>2+</sup> ions from aqueous solution, *Surf. Interfaces* 29(2022)101808, <https://doi.org/10.1016/j.surf.2022.101808>
7. X. Jiang, Q.-D. An, Z.-Y. Xiao, S.-R. Zhai, Z. Shi, Versatile core/shell-like alginate@polyethylenimine composites for efficient removal of multiple heavy metal ions (Pb<sup>2+</sup>, Cu<sup>2+</sup>, CrO<sub>4</sub><sup>2-</sup>): Batch and fixedbed studies, *Mater. Res. Bull.* 118(2019)110526, <https://doi.org/10.1016/j.materresbull.2019.110526>,
8. Y. Yan, Q. An, Z. Xiao, W. Zheng, S. Zhai, Flexible core-shell/bead-like alginate@PEI with



- exceptional adsorption capacity, recycling performance toward batch and column sorption of Cr(VI), *Chem. Eng. J.* 313(2017)475-486, <http://dx.doi.org/10.1016/j.cej.2016.12.099>
9. W. You, M. Hong, H. Zhang, Q. Wu, Z. Zhuang, Y. Yu, Functionalized calcium silicate nanofibers with hierarchical structure derived from oyster shells and their application in heavy metal ions removal, *Phys. Chem. Chem. Phys.*,18(2016)15564, doi: 10.1039/c6cp01199c
  10. Y. Yan, Y. Chu, M.A. Khan, M. Xia, M. Shi, S. Zhu, W. Lei, F. Wang, Facile immobilization of ethylenediamine tetramethylene-phosphonic acid into UiO-66 for toxic divalent heavy metal ions removal: An experimental and theoretical exploration, *Sci. Total Environ.* 806(2022)150652,<https://doi.org/10.1016/j.scitotenv.2021.150652>
  11. X. Bai, L. Xing, N. Liu, N. Ma, K. Huang, D. Wu, M. Yin, K. Jiang, Humulus scandens-derived biochars for the effective removal of heavy metal ions: Isotherm/kinetic study, column adsorption and mechanism investigation, *Nanomaterials* 11(2021)3255. <https://doi.org/10.3390/nano11123255>
  12. W. Fu, G. Ji, H. Chen, S. Yang, H. Yang, B. Guo, Z. Huang, Engineering anion resin based amorphous molybdenum sulphide composite for treatment of authentic acid mine drainage, *J. Environ. Chem. Eng.* 8(2020)104072, <https://doi.org/10.1016/j.jece.2020.104072>
  13. T. Liu, S. Gou, Y. He, S. Fang, L. Zhou, G. Gou, L. Liu, N-methylene phosphonic chitosan aerogels for efficient capture of Cu<sup>2+</sup> and Pb<sup>2+</sup> from aqueous environment, *Carbohydr. Polym.* 269(2021)118355, <https://doi.org/10.1016/j.carbpol.2021.118355>
  14. L. Liu, S. Liu, H. Peng, Z. Yang, L. Zhao, A. Tang, Surface charge of mesoporous calcium silicate and its adsorption characteristics for heavy metal ions, *Solid State Sci.* 99(2020)106072,<https://doi.org/10.1016/j.solidstatesciences.2019.106072>
  15. J. Zhao, Y.-J. Zhu, J. Wu, J.-Q. Zheng, X.-Y. Zhao, B.-Q. Lu, F. Chen, Chitosan-coated mesoporous microspheres of calcium silicate hydrate: Environmentally friendly synthesis and application as a highly efficient adsorbent for heavy metal ions, *J. Colloid. Interf. Sci.* 418(2014)208-215,<https://doi.org/10.1016/j.jcis.2013.12.016>
  16. M.A. Tofiqhy, T. Mohammadi, Synthesis and characterization of ceramic/carbon nanotubes composite adsorptive membrane for copper ion removal from water, *Korean J. Chem. Eng.* 32 (2014) 292–298, <https://doi.org/10.1007/s11814-014-0210-4>.
  17. S. Abd Hamid, M. Shahadat, B. Ballinger, S. Farhan Azha, S. Ismail, S. Wazed Ali, S. Ziauddin Ahammad, Role of clay-based membrane for removal of copper from aqueous solution, *J. Saudi Chem. Soc.* 24 (2020) 785–798, <https://doi.org/10.1016/j.jscs.2020.08.007>
  18. B. Gohari, N. Abu-Zahra, Polyethersulfone Membranes Prepared with 3-Aminopropyltriethoxysilane Modified Alumina Nanoparticles for Cu(II) Removal from Water, *ACS Omega* 3(2018) 10154–10162, <https://doi.org/10.1021/acsomega.8b01024>
  19. D. N. A. Chee, F. Aziz, A. F. Ismail, M. A. M. Amin, M. S. Abdullaha, Dual-function ZIF-8 membrane supported on alumina hollow fiber membrane for copper(II) removal, *J. Environ. Chem. Eng.* 9(2021) 105343, <https://doi.org/10.1016/j.jece.2021.105343>
